1 Speech intelligibility predicted from neural entrainment of  
2 the speech envelope \*

3 Jonas Vanthornhout<sup>1</sup>, Lien Decruy<sup>1</sup>, Jan Wouters<sup>1</sup>, Jonathan Z. Simon<sup>2</sup>, and  
4 Tom Francart<sup>1</sup>

5 <sup>1</sup>KU Leuven - University of Leuven, Department of Neurosciences, ExpORL

6 <sup>2</sup>Department of Electrical and Computer Engineering, University of Maryland,  
7 College Park, USA; Department of Biology, University of Maryland, College  
8 Park, USA; Institute for Systems Research, University of Maryland, College  
9 Park, USA

10 Received: date / Accepted: date

11 **Abstract**

12 Speech intelligibility is currently measured by scoring how well a person can identify  
13 a speech signal. The results of such behavioral measures reflect neural processing of the  
14 speech signal, but are also influenced by language processing, motivation and memory. Very  
15 often electrophysiological measures of hearing give insight in the neural processing of sound.  
16 However, in most methods non-speech stimuli are used, making it hard to relate the re-  
17 sults to behavioral measures of speech intelligibility. The use of natural running speech as  
18 a stimulus in electrophysiological measures of hearing is a paradigm shift which allows to

---

\*Financial support was provided by the KU Leuven Special Research Fund under grant OT/14/119 to Tom Francart. Research funded by a PhD grant of the Research Foundation Flanders (FWO). This project has received funding from the European Research Council (ERC) under the European Union's Horizon 2020 research and innovation programme (grant agreement No 637424), from the YouReCa Junior Mobility Programme under grant JUMO/15/034 to Jonas Vanthornhout, from NIH grant R01-DC-014085 to Jonathan Z. Simon and from FWO project grant G.0662.13. The authors declare that they have no conflict of interest.

19 bridge the gap between behavioral and electrophysiological measures. Here, by decoding  
20 the speech envelope from the electroencephalogram, and correlating it with the stimulus  
21 envelope, we demonstrate an electrophysiological measure of neural processing of running  
22 speech. We show that behaviorally measured speech intelligibility is strongly correlated  
23 with our electrophysiological measure. Our results pave the way towards an objective and  
24 automatic way of assessing neural processing of speech presented through auditory prosthe-  
25 ses, reducing confounds such as attention and cognitive capabilities. We anticipate that our  
26 electrophysiological measure will allow better differential diagnosis of the auditory system,  
27 and will allow the development of closed-loop auditory prostheses that automatically adapt  
28 to individual users.

## 29 **1 Introduction**

30 The human auditory system processes speech in different stages. The auditory periphery converts  
31 the sound pressure wave into neural spike trains, the auditory cortex segregates streams, and  
32 finally specialized language processing areas are activated, which interact with short and long  
33 term memory. Each of these subsystems can be impaired, so in diagnostics it is crucial to be able  
34 to measure the function of the auditory system at the different levels. The current audiometric  
35 test battery consists of behavioral tests of speech intelligibility and objective measures based on  
36 electroencephalogram (EEG).

37 In behavioral tests of speech intelligibility the function of the entire auditory system is mea-  
38 sured. A fragment of natural speech is presented and the subject is instructed to identify it. When  
39 the goal is to assess the function of the auditory periphery, such as fitting auditory prostheses,  
40 language knowledge and cognitive function such as working memory are confounds. Additionally,  
41 behavioral testing requires active participation of the test subject, which is not always possible  
42 and leads to another confound: motivation and attention. With current EEG-based objective  
43 measures, it is possible to measure the function of intermediate stages of the auditory system, but  
44 unnatural periodic stimuli, such as click trains, modulated tones or repeated phonemes are used  
45 (e.g., Anderson et al, 2013; Picton et al, 2005; McGee and Clemis, 1980), which are acoustically  
46 different from natural running speech, and are processed differently by the brain (Hullett et al,  
47 2016). While these measures yield valuable information about the auditory system, they are not  
48 well-correlated with behaviorally measured speech intelligibility. Another practical downside of

49 non-speech stimuli is that they may be processed differently from speech by modern auditory  
50 prostheses which take into account the statistics of speech signals (Dillon, 2012). This is prob-  
51 lematic when assessing a subject's hearing through an auditory prosthesis such as a hearing aid  
52 or cochlear implant.

53 The missing link between behavioral and objective measures is a measure of neural processing  
54 of the acoustic cues in speech that lead to intelligibility. The most important acoustic cue for  
55 speech intelligibility is the temporal envelope (Shannon et al, 1995; Peelle and Davis, 2012)  
56 and especially modulation frequencies below 20 Hz (Drullman et al, 1994b,a). Recently, it has  
57 been shown with non-invasive magnetoencephalography (MEG) and EEG recordings that neural  
58 processing of the speech envelope can be inferred from the correlation between the actual speech  
59 envelope and the speech envelope decoded from the neural signal (Aiken and Picton, 2008;  
60 Ding and Simon, 2011). Even for running speech in a single-trial paradigm i.e., presenting the  
61 stimulus only once the speech envelope could reliably be reconstructed (Ding and Simon, 2012,  
62 2013; O'Sullivan et al, 2014; Di Liberto et al, 2015; Horton et al, 2014). A decoder transforms  
63 the multi-channel neural signal into a single-channel speech envelope, by linearly combining  
64 amplitude samples across MEG sensors and across a post-stimulus temporal integration window.  
65 Based on training data, the decoder is calculated as the linear combination that maximizes the  
66 correlation with the actual speech envelope. This method has also been shown to work with  
67 electroencephalography (EEG) recordings (O'Sullivan et al, 2014). Furthermore, using surface  
68 recordings of the cortex, the full stimulus spectrogram can be decoded (Pasley et al, 2012), and  
69 inversely the full spectrogram and even phoneme representation can be used to predict the EEG  
70 signal (Di Liberto et al, 2015).

71 Using these techniques, previous research has compared the correlation between the speech  
72 envelope and the reconstructed envelope, with speech intelligibility (Ding and Simon, 2013; Kong  
73 et al, 2015). However, the interpretation of the results is complicated by the fact that speech  
74 intelligibility could fluctuate over time due to the use of non-standardized running speech as a  
75 stimulus, and because subjective ratings were used as a measure of speech intelligibility instead  
76 of standardized speech audiometry. Standardized audiometric speech materials are carefully  
77 optimized for precision and reliability, something which is difficult, if not impossible with running  
78 speech and subjective ratings.

79 Therefore, we developed an objective measure of neural processing of the speech envelope

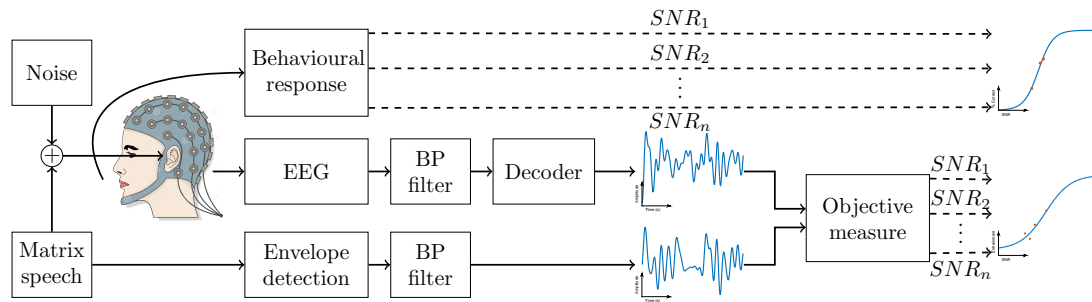

Figure 1: Overview of the experimental setup. We used the Flemish Matrix sentences to behaviourally measure speech intelligibility. In the EEG experiment we presented stimuli from the same Matrix corpus while measuring the EEG. By correlating the speech envelopes from the Matrix and the envelopes decoded from the EEG, we obtained our objective measure.

80 based on the stimulus reconstruction method and compared it with behaviourally measured speech  
81 intelligibility. We do not expect these measures to correspond exactly, as there are some inherent  
82 differences, in particular the higher level functions such as working memory and cognitive function  
83 that are relied upon for the behavioural measure and not so much for the objective one. However,  
84 on the one hand we reduced those differences by the choice of materials and methods, and on  
85 the other hand it remains important to compare our novel objective measure to the current gold  
86 standard for measuring speech intelligibility. We used EEG rather than MEG, as it is ubiquitous,  
87 can be implemented on a large scale, and is often available for clinical application.

## 88 2 Methods

89 An overview of our methods is shown in Figure 1. Briefly, in a behavioral and EEG experiment,  
90 we used the same speech stimuli, from a standardized speech test, combined with spectrally  
91 matched stationary noise at different signal to noise ratios (SNRs). In the behavioral experiment,  
92 we determined the speech reception threshold (SRT). In the EEG experiment, we determined  
93 neural entrainment of the speech envelope as a function of SNR, and derived an objective measure.  
94 We then compared the SRT with the objective measure on an individual subject basis.

95 The objective measure is obtained by on the one hand determining the slowly varying tempo-  
96 ral envelope of the speech signal (bottom row of Figure 1), which can be thought of as the signal

97 power over time, and on the other hand attempting to decode this same envelope from the EEG  
98 signal (middle row of Figure 1). To this end, for each subject a decoder is trained on speech  
99 in quiet, which decodes the speech envelope as a linear combination of EEG samples, across a  
100 temporal integration window, and across the EEG recording electrodes. The actual and decoded  
101 envelopes are then correlated with each other, which yields a measure of neural entrainment of  
102 the speech envelope. After repeating this process for a number of SNRs, a sigmoid function is  
103 fitted to the results. The midpoint of the resulting sigmoid function is our objective measure,  
104 which we call the correlation threshold (CT).

## 105 **2.1 Participants**

106 We tested 24 normal-hearing subjects, 7 male and 17 female, recruited from our university student  
107 population to ensure normal language processing and cognitive function. Their age ranged from  
108 21 to 29 years with an average of 24.3 years. Every subject reported normal hearing, which was  
109 verified by pure tone audiometry (thresholds lower than 25 dB HL for 125 Hz until 8000 Hz  
110 using MADSEN Orbiter 922-2). They had Dutch (Flemish) as mother tongue and were unpaid  
111 volunteers. Before each experiment the subjects signed an informed consent form approved by  
112 the Medical Ethics Committee UZ KU Leuven / Research (KU Leuven) with reference S59040.

## 113 **2.2 Behavioral experiments**

114 The behavioral experiments consisted of tests with the Flemish Matrix material Luts et al (2015)  
115 using the method of constant stimuli at 3 SNRs around the SRT. This material is divided in lists  
116 of 20 sentences which have been shown to yield similar behavioral speech intelligibility scores.  
117 Such validated tests, consisting of a standardized corpus of sentences, are currently the gold  
118 standard in measuring speech intelligibility, both in research and clinical practice. Sentences  
119 were spoken by a female speaker and presented to the right ear. They have a fixed structure  
120 of ‘name verb numeral adjective object’, where each element is selected from a closed set of ten  
121 possibilities, e.g., ‘Sofie ziet zes grijze pennen’ (‘Sofie sees six gray pens’). These sentences sound  
122 perfectly natural, but are grammatically trivial and completely unpredictable, thus minimizing  
123 the effect of higher order language processing.

124 The experiments were conducted on a laptop running Windows using the APEX 3 (version

125 3.1) software platform developed at ExpORL (Dept. Neurosciences, KU Leuven) (Francart et al,  
126 2008), an RME Multiface II sound card (RME, Haimhausen, Germany) and Etymotic ER-3A  
127 insert phones (Etymotic Research, Inc., Illinois, USA) which were electromagnetically shielded  
128 using CFL2 boxes from Perancea Ltd. (London, United Kingdom). The speech was presented  
129 monaurally at 60 dBA and the setup was calibrated in a 2-cm<sup>3</sup> coupler (Brüel & Kjør 4152)  
130 using the stationary speech weighted noise corresponding with the Matrix speech material. The  
131 experiments took place in an electromagnetically shielded and soundproofed room.

### 132 **2.3 EEG experiments**

133 **Setup** To measure auditory evoked potentials we used a BioSemi (Amsterdam, Netherlands)  
134 ActiveTwo EEG setup with 64 electrodes and recorded the data at a sampling rate of 8192 Hz  
135 using the ActiView software provided by BioSemi. The stimuli were presented with the same  
136 setup as the behavioral experiments, with the exception of diotic stimulation and adapting the  
137 noise level instead of the speech level for the EEG experiment.

138 **Speech material** We presented stimuli created by concatenating two lists of Flemish Matrix  
139 sentences with a gap between the sentences. This length of this gap was uniformly distributed  
140 between 0.8 s and 1.2 s. The total duration of this stimulus was around 120 seconds. It was  
141 presented at 3, 5 or 7 different SNRs with the speech level fixed at 60 dBA. The order of SNRs  
142 was randomised across subjects. Each stimulus was presented 3 or 4 times. The total duration  
143 of the experiment was 2 hours. To keep the subjects attentive, questions about the stimuli were  
144 asked before and after the presentation of the stimulus. The questions were typically counting  
145 tasks, e.g. ‘How many times did you hear “gray pens”?’. These Matrix sentences were used to  
146 objectively estimate the speech understanding.

147 **Speech story** The subjects listened to the children’s story ‘Milan’, written and narrated in  
148 Flemish by Stijn Vranken<sup>1</sup>. It was 15 minutes long and was presented at 60 dBA without any  
149 noise. The purpose of this stimulus was to have a continuous, attended stimulus to train the  
150 linear decoder. No questions were asked before or after this stimulus.

---

<sup>1</sup><http://www.radioboeken.eu/radioboek.php?id=193&lang=NL>

## 151 2.4 Signal processing

152 **Speech** We measured envelope entrainment by calculating the bootstrapped Spearman corre-  
153 lation (see below) between the stimulus speech envelope and the envelope reconstructed by a  
154 linear decoder. All implementations were written in MATLAB R2016b.

155 The stimulus speech envelope was extracted according to Biesmans et al (2016), who investi-  
156 gated the effect of envelope extraction method on auditory attention detection, and found best  
157 performance for a gammatone filterbank followed by a power law. In more detail, we used a gam-  
158 matone filterbank (Søndergaard and Majdak, 2013; Søndergaard et al, 2012) with 28 channels  
159 spaced by 1 equivalent rectangular bandwidth (ERB), with center frequencies from 50 Hz until  
160 5000 Hz. From each subband we extracted the envelope by taking the absolute value of each  
161 sample and raising it to the power of 0.6. The resulting 28 subband envelopes were averaged to  
162 obtain one single envelope. The power law was chosen as the human auditory system is not a  
163 linear system and compression is present in the system. The gammatone filterbank was chosen  
164 as it mimics the auditory filters present in the basilar membrane in the cochlea.

165 The speech envelope and EEG signal were band-pass filtered. We investigated performance  
166 for a range of filter cut-off frequencies. The same filter (a zero phase Butterworth filter with  
167 80 dB attenuation at 10% outside the passband) was applied to the EEG and speech envelope.  
168 Before filtering, the EEG data were re-referenced to Cz and were downsampled from 8192 Hz  
169 to 1024 Hz to decrease processing time. After filtering, the data were further downsampled to  
170 64 Hz.

171 A decoder, is a spatial filter, over EEG electrodes and a temporal filter, over time lags which  
172 optimally reconstructs the speech envelope from the EEG. The decoder linearly combines EEG  
173 electrode signals and their time shifted versions to optimally reconstruct the speech envelope.  
174 In the training phase, the weights to be applied to each signal in this linear combination are  
175 determined. The decoder was calculated using the mTRF toolbox (version 1.1) (Lalor et al,  
176 2006, 2009) and applied as follows. As the stimulus evoked neural responses at different delays  
177 along the auditory pathway, we define a matrix  $R$  containing the shifted neural responses of each  
178 channel. If  $g$  is the linear decoder and  $R$  is the shifted neural data, the reconstruction of the  
179 speech envelope  $\hat{s}(t)$  was obtained as follows:

$$\hat{s}(t) = \sum_{n=1}^N \sum_{\tau} g(n, \tau) R(t + \tau, n)$$

180 with  $t$  the time ranging from 0 to  $T$ ,  $n$  the index of the recording electrode and  $\tau$  the post-stimulus  
181 integration-window length used to reconstruct the envelope. The matrix  $g$  can be determined by  
182 minimizing a least-squares objective function

$$g = \arg \min E(|\hat{s}(t) - s(t)|^2)$$

183 where  $E$  denotes the expected value,  $s(t)$  the real speech envelope and  $\hat{s}(t)$  the reconstructed  
184 envelope. In practice we calculated the decoder by solving

$$g = (RR^T)^{-1}(RS^T)$$

185 where  $R$  is the time-lagged matrix of the neural data and  $S$  a vector of stimulus envelope samples.  
186 The decoder is calculated using ridge regression on the inverse autocorrelation matrix.

187 We trained a new decoder for each subject on the story stimulus, which was 15 minutes long.  
188 After training, the decoder was applied on the EEG responses to the Flemish Matrix material.

189 To measure the correspondence between the speech envelope and its reconstruction, we cal-  
190 culated the bootstrapped Spearman correlation between the real and reconstructed envelope.  
191 Bootstrapping was applied by Monte Carlo sampling of the two envelopes. Some examples of  
192 actual and reconstructed envelopes and the corresponding correlations are shown in figure 2.

193 Our goal is to derive an objective measure of speech intelligibility, similar to the SRT for  
194 behavioral tests. Therefore the correlation between real and reconstructed envelope needs to  
195 increase with SNR, just like the percentage correctly repeated words increases with SNR in  
196 behavioral measures. To allow quantitative comparison between the different conditions of band  
197 pass filter and decoder temporal integration window, we defined a measure of monotonicity  
198 of the stimulus SNR versus correlation function. For each subject it indicates the percentage  
199 that the following comparisons are true: the correlation at the lowest SNR is lower than the  
200 correlations at the middle and highest SNR, and the correlation at the highest SNR is higher  
201 than the correlation at the lowest SNR. The band pass filter and temporal integration window  
202 were chosen to maximize this measure across all subjects.

### 203 **3 Results**

204 As different roles are attributed to different EEG frequency bands, we first investigated the  
205 effect of the cut-off frequencies of the band-pass filter that is applied to both the envelope



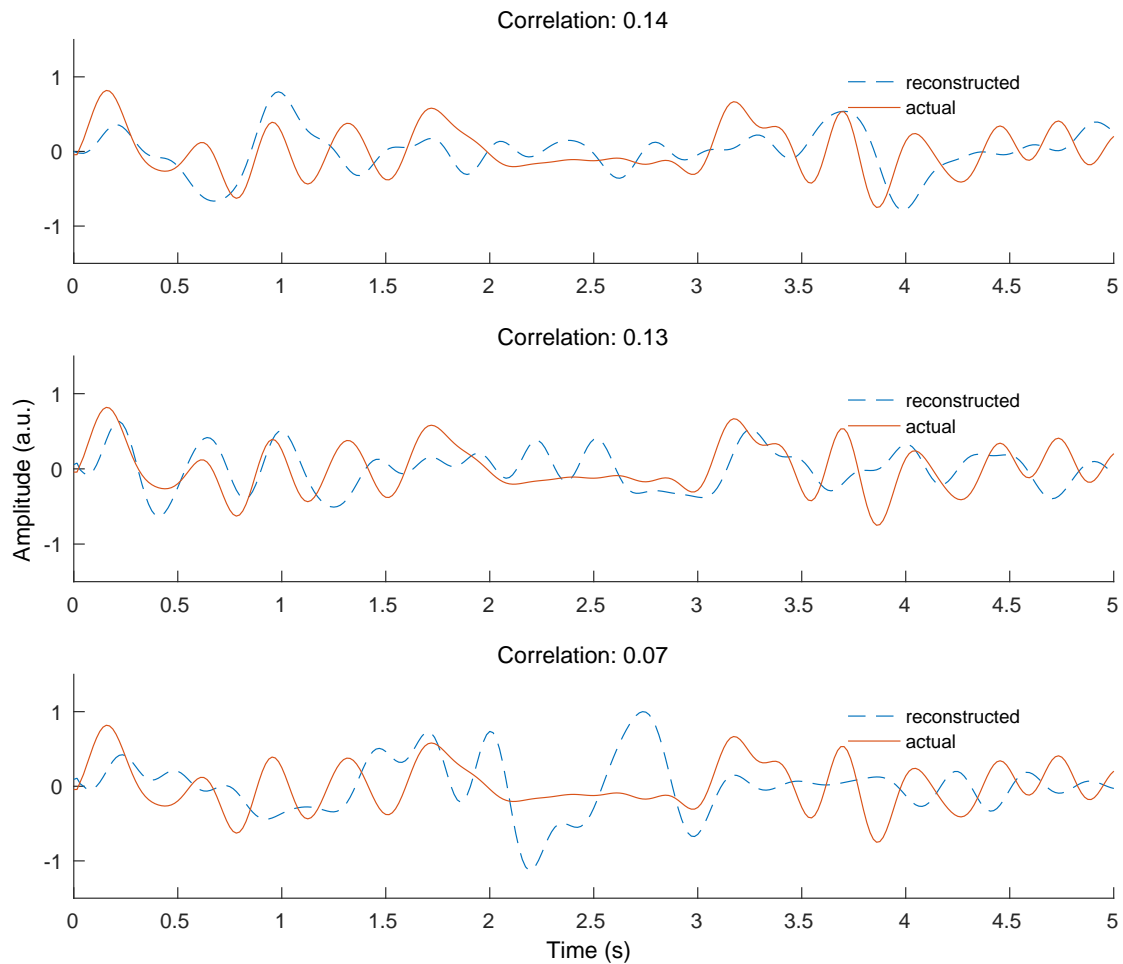

Figure 2: Examples of actual and reconstructed envelopes and the corresponding correlations.

206 and EEG signal. Next, we investigated the effect of integration window of the decoder. This  
207 can be understood as the number of EEG samples following the acoustic stimulus that are  
208 taken into account. For both the filter and the integration window we selected the parameter  
209 values that yielded optimal monotonicity of the entrainment versus SNR. Finally, using the  
210 optimal parameters, we calculated the correlation between the actual speech envelope and the  
211 reconstructed envelope for each SNR, derived our objective measure of speech intelligibility, and  
212 compared it to the behavioral SRT.

### 213 **3.1 Filter band**

214 Neural responses are mostly analyzed in specific filter bands. Much of the speech-related EEG  
215 research focuses on the delta band (0.5 Hz - 4 Hz) and theta band (4 Hz - 8 Hz) (O'Sullivan  
216 et al, 2014; Ding and Simon, 2013; Doelling et al, 2014). We systematically investigated the  
217 effect of low- and high-pass frequency of the band on monotonicity of the reconstruction quality  
218 as a function of stimulus SNR. We found best monotonicity using only the delta band (Figure  
219 3a). Best performance was found when low frequencies are included. As a result we used a filter  
220 band from 0.5 until 4 Hz.

### 221 **3.2 Integration window**

222 We systematically varied the temporal integration window of the decoder, and found best mono-  
223 tonicity of the reconstruction quality using an integration window focusing on early responses,  
224 from 0 ms up to 75-140 ms, see Figure 3b. Other research has shown that early responses yield  
225 a more gradual decline in correlation with decrease in SNR (Ding and Simon, 2013), compared  
226 to later responses, and that earlier responses are less modulated by attention (Ding and Simon,  
227 2012; O'Sullivan et al, 2014). Based on these findings and our results, we used an integration  
228 window from 0 ms until 75 ms.

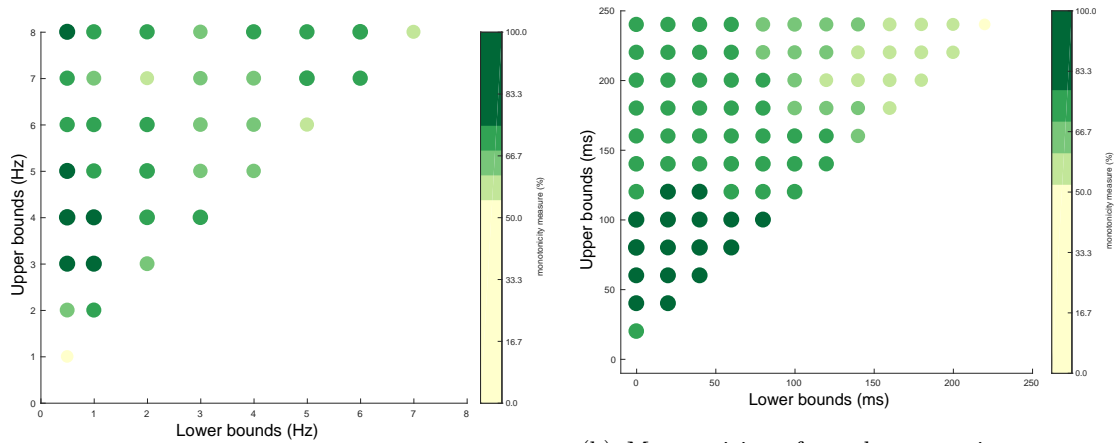

(a) Monotonicity of envelope entrainment as a function of lower and upper bound of the pass band filter. Warm colors reflect a higher percentage correct. Best performance is seen when low frequencies (0.5 until 4 Hz) are included.

(b) Monotonicity of envelope entrainment as a function of lower and upper bound of the temporal integration window of the decoder. Warm colors reflect a higher percentage correct. Best performance is seen for integration windows including early responses from 0 ms up to 75-140 ms.

Figure 3: The monotonicity of envelope entrainment as a function of frequency bands and temporal integration window.

### 229 3.3 Behavioral versus Objective

230 Behavioral speech intelligibility was characterized by the speech reception threshold (SRT), i.e.,  
 231 the SNR yielding 50% intelligibility. It was obtained by fitting a sigmoid function with the  
 232 formula  $S(SNR) = \gamma + (1 - \gamma - \lambda) \frac{1}{1 + e^{-\frac{SNR - \alpha}{\beta}}}$  with  $\gamma$  the guess-rate,  $\lambda$  the lapse-rate,  $\alpha$  the  
 233 midpoint and  $\beta$  the slope, to the SNR-versus-intelligibility points for each subject individually  
 234 (e.g., Figure 4a). For the behavioral data,  $\gamma$  and  $\lambda$  were fixed to 0, leaving 2 parameters to be  
 235 fitted to 3 data points, as is common for obtaining the SRT. The mean of the individual SRTs  
 236 was -7.4 dB with an inter-subject standard deviation of 1.3 dB, ranging from -9.9 dB to -4.7 dB.

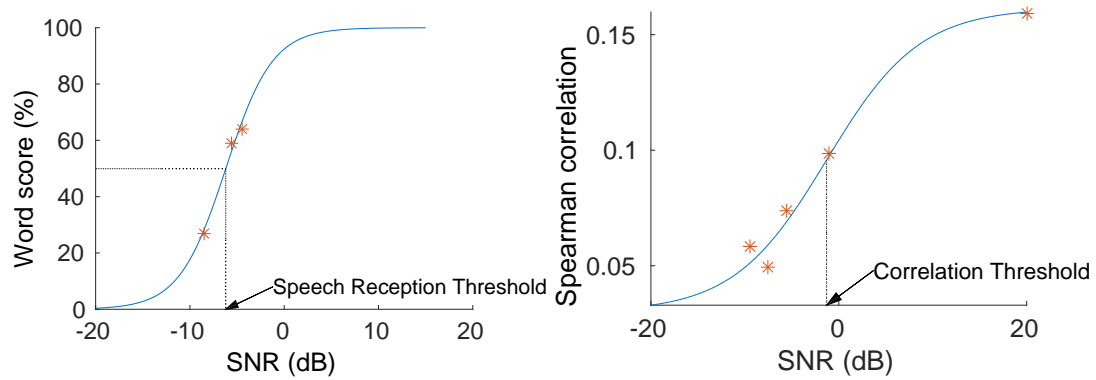

(a) The percentage of words correctly understood increases with increasing SNR. The blue line is a speech envelope and speech envelope extracted sigmoid function fitted on these data, from which from the EEG response increases with increasing we can estimate the speech reception threshold SNR. The blue line is a sigmoid function fitted on (SRT). (b) The Spearman correlation between actual and speech envelope increases with increasing SNR. The blue line is a sigmoid function fitted on these data, from which we can estimate our objective measure, the correlation threshold (CT).

Figure 4: Behavioral and objective results for one subject.

237 The objective measure was inspired by the behavioral one in the sense that we obtained a  
238 single-trial score for each of a range of SNRs and then fitted a sigmoid function. The score was  
239 calculated as the absolute value of the Spearman correlation between the actual and the decoded  
240 speech envelope. In Figure 5 the scores for each subject and SNR are shown.

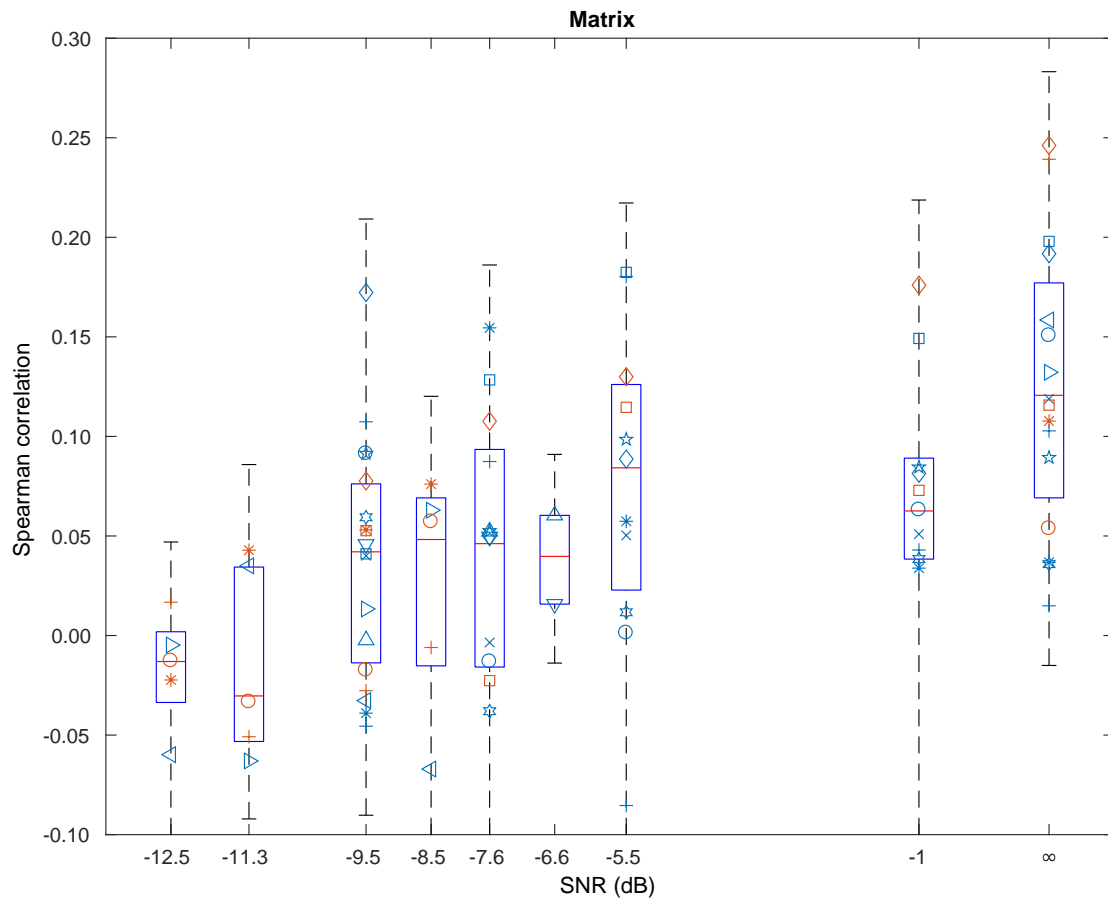

Figure 5: Individual data points of the entrainment over SNRs. Each subject is a different symbol, the boxplot gives an idea of the variance across subjects.

241 For the objective data,  $\gamma$  was fixed to 0.03, the chance level of the correlation. The chance  
242 level was computed by correlating the reconstructed envelope with a different part of the actual  
243 envelope. As a result we fitted the remaining 3 parameters to at least 5 data points. After fitting  
244 the function, we derived its midpoint, and used this as our objective measure, which we will refer  
245 to as the correlation threshold (CT), e.g., Figure 4b. The benefit of this measure, compared to  
246 using the correlation value at a single SNR directly, is that the target SNR, which is subject  
247 specific, does not need to be known a priori and that it is robust to inter-subject differences in  
248 correlation magnitude.

249 Using individual decoders we were able to obtain a good fit of the sigmoid function for  
250 19 of the 24 subjects, i.e., no fitted parameter was equal to its lower or upper bound, and

251 consequently derived the CT. We found a significant Pearson correlation of 0.69 between SRT  
252 and CT ( $p=0.001$ , Figure 6). Given the relatively small range of behavioral results for these  
253 normal-hearing subjects, from -9.9 dB SNR to -4.7 dB SNR, and a typical test-retest difference  
254 of 1 dB of the behavioral measure, this indicates that our objective measure is sensitive to small  
255 changes in SRT.

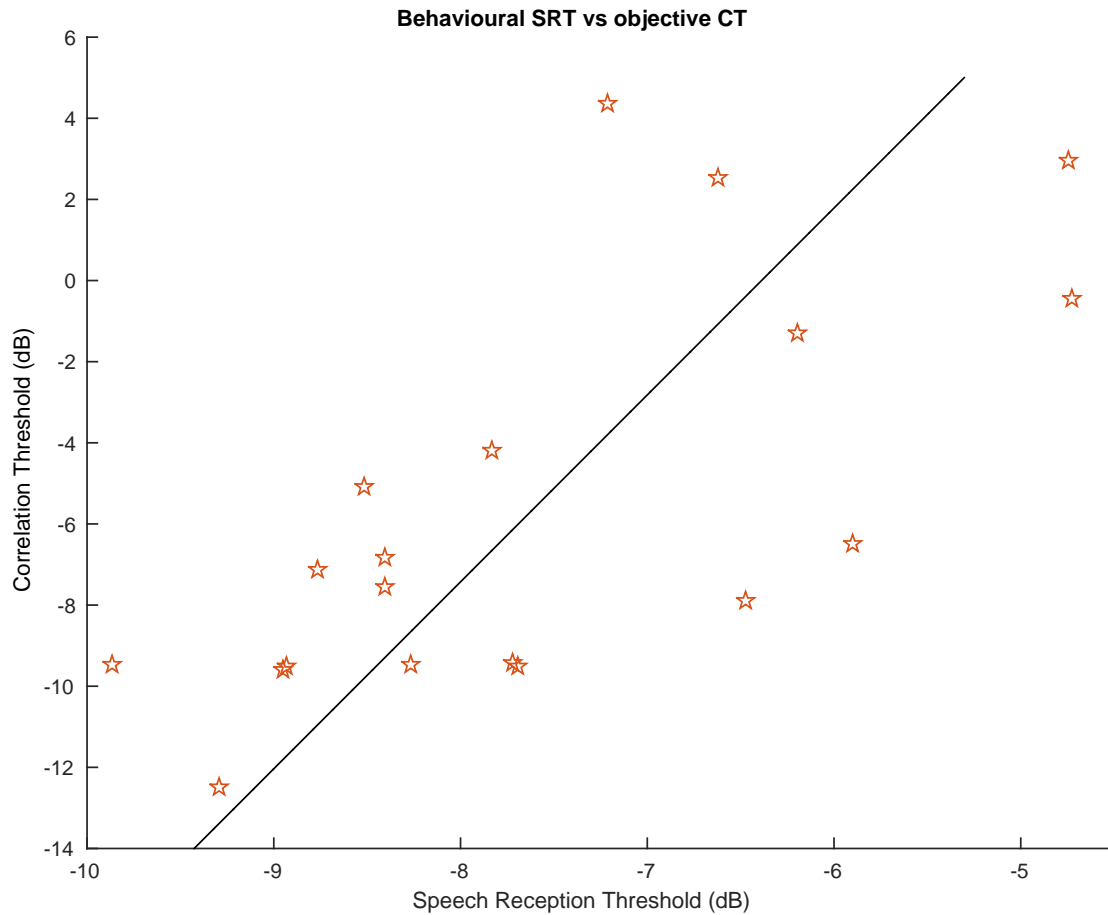

Figure 6: Electrophysiological versus behavioral measure (Pearson's  $r = 0.69$ ,  $p = 0.001$ ). The electrophysiological measure (correlation threshold, CT) is the midpoint of each psychometric function. The behavioral measure (speech reception threshold, SRT) is the stimulus SNR at which the subject can understand 50% of the words.

## 256 **4 Discussion**

257 We compared a new objective measure of speech intelligibility (the CT) to the behaviorally  
258 measured SRT for 24 normal-hearing subjects. The objective measure is based on the correlation  
259 between the actual speech envelope and the speech envelope reconstructed from the EEG signal,  
260 a measure of neural entrainment to the speech envelope. We fitted a sigmoid function to the  
261 resulting entrainment versus stimulus SNR data, and derived the CT as its midpoint. We found  
262 a significant correlation between the objectively measured CT and behaviorally measured SRT.

### 263 **4.1 Filter band**

264 We found highest monotonicity in the delta band. This band encompasses the main information  
265 in the modulation spectrum of speech which exhibits peaks at the sentence rate (0.5 Hz) and  
266 word rate (2.5 Hz) (Edwards and Chang, 2013). It contains the prosodic information which is  
267 known to be important for speech intelligibility (Woodfield and Akeroyd, 2010). For the Matrix  
268 sentences, sharp peaks can be observed in the modulation spectrum at 0.5, 2.5 and 4.1 Hz, due  
269 to low variation among the sentences. Note that the delta band does not include the syllable  
270 rate of the Matrix sentences (4.1 Hz). Ding and Simon (2013); Ding et al (2014); Doelling et al  
271 (2014) also found that the neural responses in delta band were a predictor of how well individual  
272 subjects recognized speech in noise.

### 273 **4.2 Integration window**

274 We found best monotonicity of correlation as a function of SNR for an integration window from  
275 0 ms until 75 ms. This may be counter-intuitive as higher correlation values, but not monotonicity  
276 are obtained using a longer integration window, such as 0 ms until 500 ms (Ding and Simon,  
277 2013) and other studies focus more on later responses (O’Sullivan et al, 2014; Di Liberto et al,  
278 2015). However recent work (Ding and Simon, 2012; O’Sullivan et al, 2014) shows that early  
279 responses (0 ms to 75 ms) are less modulated by attention compared to later responses (later  
280 than 75 ms). Our stimulus is unpredictable and not particularly engaging, so it is likely that the  
281 subjects were not attentive throughout the entire experiment (in spite of the instructions). By  
282 using only the early responses we limit the attentional effects.

### 283 4.3 Behavioral versus Objective

284 We found a significant correlation between the behaviorally measured SRT and our new objective  
285 measure (CT). Ding and Simon (2014) reviewed a number of studies in which similar comparisons  
286 are made. They concluded that in many cases stimuli which differ in intelligibility also differ in  
287 acoustic properties, making it difficult to determine if changes in cortical entrainment arise from  
288 changes in speech intelligibility or from changes in acoustic properties. We addressed this by  
289 using stimuli with similar statistics in all conditions. Additionally, in previous work, subjective  
290 ratings of intelligibility of a non-standardized story were used as the behavioral measurement.  
291 The problem is that such measures are prone to large inter-subject differences and larger vari-  
292 ability than for standardized speech audiometry. We addressed this by using standardized speech  
293 material as the stimulus for both the behavioral and EEG experiments. Moreover, the correla-  
294 tion between actual and reconstructed envelope can differ widely in magnitude across subjects,  
295 due to differences in recording SNR of the EEG signal. Therefore we avoided using it directly  
296 and instead captured the trend across SNRs by fitting a sigmoid function.

297 Ding and Simon (2013) found a correlation between subjectively rated intelligibility and  
298 reconstruction accuracy in an MEG experiment. When assessing reconstruction accuracy as a  
299 function of SNR across subjects, they found that it was relatively unaffected down to a certain  
300 SNR and then sharply dropped. Possible explanations for the difference with our results, where  
301 we found a more gradual decrease in reconstruction accuracy with SNR, are the type of speech  
302 material used (low-context Matrix sentences versus a story) and the decoder integration window  
303 length (75 ms versus 250 ms).

304 The correlation between the SRT and the CT only explains 50 percent of the variance. The  
305 remainder can be attributed to limitations of our model, state of the subject, and limitations  
306 of the behavioural measure. In our model, we only used the speech envelope, which is a crude  
307 representation of a speech signal, and indeed the auditory system uses many other cues such  
308 as frequency-dependent envelopes and temporal fine structure. For instance, Di Liberto et al  
309 (2015) have shown that including the entire spectrogram or even a phoneme-representation of  
310 the stimulus can improve performance. Also, our simple linear decoder is probably not able  
311 to cope with all the complexity of the auditory system and brain, and the EEG technique has  
312 inherent problems, such as a low SNR of the signal of interest. Therefore in the future non-linear



313 techniques such as artificial neural networks may yield improved performance (e.g., Yang et al  
314 (2015)).

315 Even with perfect reconstruction of the envelope from the EEG, differences between the CT  
316 and SRT can still be expected. First of all, the SRT obtained in a behavioral experiment is not  
317 infinitely precise, with a typical test-retest difference of around 2 dB. Second, the two measures  
318 do not reflect exactly the same thing: the CT presumably reflects relatively early neural coding of  
319 the speech envelope, while the SRT is the product of much more extensive processing, including  
320 remembering and repeating the sentence. Another difference is procedural in nature: in the  
321 behavioral experiment, we collected a response after each sentence was presented, ensuring the  
322 subject's continuous attention. In the EEG experiment we continuously recorded the EEG during  
323 the stimulus, and it is likely that the subject's attention lapsed once in a while. We attempted  
324 to mitigate these differences by selecting young, cognitively strong listeners, using low-context  
325 speech material, clear instructions, and asking the subjects regular questions during the EEG  
326 experiment to ensure they remained attentive.

327 To translate this method to the clinic, it first needs to be further validated with a more diverse  
328 population with a wider age range, including children, various degrees of hearing impairment,  
329 different languages, etc., as it is possible that the optimal signal processing parameters depend  
330 on these factors (Presacco et al, 2016). It also needs to be investigated to what extent attention  
331 influences the results.

#### 332 **4.4 Conclusions**

333 There is a missing link between the current behavioral and electrophysiological methods to assess  
334 hearing. The behavioral methods can yield a precise measure of speech intelligibility, but suffer  
335 from several confounding factors when the goal is to assess how the auditory periphery processes  
336 supra-threshold sounds. Current objective methods do not have this confound and can address  
337 specific areas in the auditory pathway. However they do not give much insight in how well the  
338 patient understands speech due to the use of simple repetitive stimuli. The proposed measure  
339 (CT) is based on running speech stimuli and is fully objective. It can on one hand provide valu-  
340 able information additional to behaviorally measured speech intelligibility in a population where  
341 cognitive factors play a role, such as in aging individuals, or during auditory rehabilitation after  
342 fitting an auditory prosthesis. On the other hand it enables completely automatic measurement,

343 which is invaluable for testing individuals who cannot provide feedback, for automatic fitting  
344 of auditory prostheses, and for closed-loop auditory prostheses that continuously adapt their  
345 function to the individual listener in a specific and changing listening environment.

346 **Acknowledgements** The authors thank Lise Goris and Eline Verschueren for their help with  
347 the data acquisition.

## 348 **References**

349 Aiken SJ, Picton TW (2008) Human cortical responses to the speech envelope. *Ear and Hearing*  
350 29(2):139–157

351 Anderson S, Parbery-Clark A, White-Schwoch T, Kraus N (2013) Auditory brainstem response  
352 to complex sounds predicts self-reported speech-in-noise performance. *Journal of Speech, Lan-*  
353 *guage, and Hearing Research* 56(1):31–43

354 Biesmans W, Das N, Francart T, Bertrand A (2016) Auditory-inspired speech envelope extraction  
355 methods for improved eeg-based auditory attention detection in a cocktail party scenario. *IEEE*  
356 *Transactions on Neural Systems and Rehabilitation Engineering*

357 Di Liberto GM, O’Sullivan JA, Lalor EC (2015) Low-frequency cortical entrainment to speech  
358 reflects phoneme-level processing. *Current Biology* 25(19):2457–2465

359 Dillon H (2012) *Hearing aids*. Thieme, Stuttgart

360 Ding N, Simon JZ (2011) Neural coding of continuous speech in auditory cortex during monaural  
361 and dichotic listening. *Journal of Neurophysiology* 107(1):78–89

362 Ding N, Simon JZ (2012) Emergence of neural encoding of auditory objects while listening to  
363 competing speakers. *Proceedings of the National Academy of Sciences* 109(29):11,854–11,859

364 Ding N, Simon JZ (2013) Adaptive temporal encoding leads to a background-insensitive cortical  
365 representation of speech. *The Journal of Neuroscience* 33(13):5728–5735

366 Ding N, Simon JZ (2014) Cortical entrainment to continuous speech: functional roles and inter-  
367 pretations. *Frontiers in Human Neuroscience* 8:311

- 368 Ding N, Chatterjee M, Simon JZ (2014) Robust cortical entrainment to the speech envelope  
369 relies on the spectro-temporal fine structure. *Neuroimage* 88:41–46
- 370 Doelling KB, Arnal LH, Ghitza O, Poeppel D (2014) Acoustic landmarks drive delta–theta  
371 oscillations to enable speech comprehension by facilitating perceptual parsing. *Neuroimage*  
372 85:761–768
- 373 Drullman R, Festen JM, Plomp R (1994a) Effect of reducing slow temporal modulations on  
374 speech reception. *The Journal of the Acoustical Society of America* 95(5):2670–2680
- 375 Drullman R, Festen JM, Plomp R (1994b) Effect of temporal envelope smearing on speech  
376 reception. *The Journal of the Acoustical Society of America* 95(2):1053–1064
- 377 Edwards E, Chang EF (2013) Syllabic (2–5 hz) and fluctuation (1–10 hz) ranges in speech and  
378 auditory processing. *Hearing research* 305:113–134
- 379 Francart T, van Wieringen A, Wouters J (2008) APEX 3: a multi-purpose test platform for  
380 auditory psychophysical experiments. *Journal of Neuroscience Methods* 172(2):283 – 293
- 381 Horton C, Srinivasan R, D’Zmura M (2014) Envelope responses in single-trial eeg indicate at-  
382 tended speaker in a ‘cocktail party’. *Journal of neural engineering* 11(4):046,015
- 383 Hullett PW, Hamilton LS, Mesgarani N, Schreiner CE, Chang EF (2016) Human superior tem-  
384 poral gyrus organization of spectrotemporal modulation tuning derived from speech stimuli.  
385 *The Journal of Neuroscience* 36(6):2014–2026
- 386 Kong YY, Somarowthu A, Ding N (2015) Effects of spectral degradation on attentional mod-  
387 ulation of cortical auditory responses to continuous speech. *Journal of the Association for*  
388 *Research in Otolaryngology* 16(6):783–796
- 389 Lalor EC, Pearlmutter BA, Reilly RB, McDarby G, Foxe JJ (2006) The vespa: a method for the  
390 rapid estimation of a visual evoked potential. *Neuroimage* 32(4):1549–1561
- 391 Lalor EC, Power AJ, Reilly RB, Foxe JJ (2009) Resolving precise temporal processing properties  
392 of the auditory system using continuous stimuli. *Journal of neurophysiology* 102(1):349–359
- 393 Luts H, Jansen S, Dreschler W, Wouters J (2015) Development and normative data for the  
394 flemish/dutch matrix test. Tech. rep.

- 395 McGee TJ, Clemis JD (1980) The approximation of audiometric thresholds by auditory brain  
396 stem responses. *Otolaryngology–Head and Neck Surgery* 88(3):295–303
- 397 O’Sullivan JA, Power AJ, Mesgarani N, Rajaram S, Foxe JJ, Shinn-Cunningham BG, Slaney M,  
398 Shamma SA, Lalor EC (2014) Attentional selection in a cocktail party environment can be  
399 decoded from single-trial eeg. *Cerebral Cortex* pp 1697–1706
- 400 Pasley BN, David SV, Mesgarani N, Flinker A, Shamma SA, Crone NE, Knight RT, Chang EF  
401 (2012) Reconstructing speech from human auditory cortex. *PLoS Biol* 10(1):e1001,251
- 402 Peelle JE, Davis MH (2012) Neural Oscillations Carry Speech Rhythm through to Comprehen-  
403 sion. *Front Psychol* 3:320
- 404 Picton TW, Dimitrijevic A, Perez-Abalo MC, Van Roon P (2005) Estimating audiometric thresh-  
405 olds using auditory steady-state responses. *Journal of the American Academy of Audiology*  
406 16(3):140–156
- 407 Presacco A, Simon JZ, Anderson S (2016) Evidence of degraded representation of speech in noise,  
408 in the aging midbrain and cortex. *Journal of neurophysiology* 116(5):2346–2355
- 409 Shannon RV, Zeng FG, Kamath V, Wygonski J, Ekelid M (1995) Speech recognition with pri-  
410 marily temporal cues. *Science* 270(5234):303–304
- 411 Søndergaard PL, Torr sani B, Balazs P (2012) The Linear Time Frequency Analysis Toolbox.  
412 *International Journal of Wavelets, Multiresolution Analysis and Information Processing* 10(4)
- 413 Søndergaard P, Majdak P (2013) The auditory modeling toolbox. In: Blauert J (ed) *The Tech-*  
414 *nology of Binaural Listening*, Springer, Berlin, Heidelberg, pp 33–56
- 415 Woodfield A, Akeroyd MA (2010) The role of segmentation difficulties in speech-in-speech un-  
416 derstanding in older and hearing-impaired adults. *The Journal of the Acoustical Society of*  
417 *America* 128(1):EL26–EL31
- 418 Yang M, Sheth SA, Schevon CA, II GMM, Mesgarani N (2015) Speech reconstruction from  
419 human auditory cortex with deep neural networks. In: *Sixteenth Annual Conference of the*  
420 *International Speech Communication Association*
